# Supplementary material
Source: publisher figshare collection journal article supplement (https://gsajournals.figshare.com/articles/dataset/_/9938045)
Supplement: Supplementary file 3 [file 1]

**Which recurrent selection scheme to improve  
mixtures of crop species?  
Theoretical expectations**

*Jean-Paul Sempoux,<sup>\*,1</sup> Héloïse Giraud,<sup>\*,2</sup> and Isabelle Litrico\**

**SUPPLEMENTAL MATERIAL  
FIGURE S2**

Pluridisciplinaire Prairies et Plantes Fourragères), CS80006, 86600 Lusignan, France

<sup>1</sup>Corresponding author: INRA, Centre Nouvelle-Aquitaine-Poitiers, UR P3F, CS80006, 86600 Lusignan, France. Phone: +33-5-49556027. E-mail: jean-paul.sempoux@inra.fr

<sup>2</sup>Present address: BASF BBCC Innovation Center, Technologiepark 101, 9052 Gent, Belgium

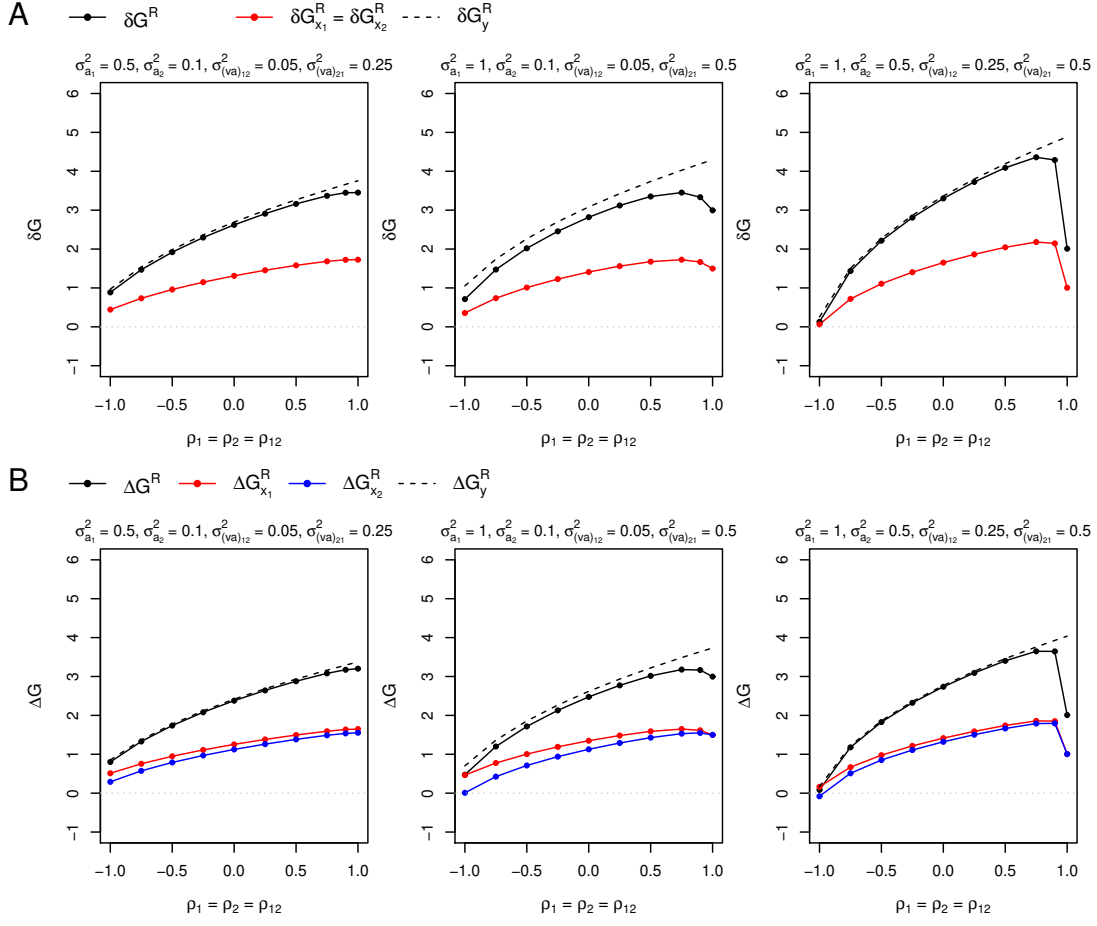

**Figure S2** Responses to selection expected from one cycle of recurrent selection for Reciprocal Mixture Ability (SRMA) between two species aiming to equate the expected responses of the contributions of the two species to the performance of their mixture. The selection criterion was a linear combination (index) of the contributions of progeny families (half-sib or topcross progeny families) of pairs of candidates from the two species to the observed performance of their mixture. Index weight was tuned in order to equate the expected responses of species contributions before recombination of selected candidates ( $\delta G_{x1}^R / \delta G_{x2}^R = 1$ ). (A) Expected responses to selection of the performance of the mixture of the two species ( $\delta G^R$ ) and of species contributions ( $\delta G_{x1}^R$  and  $\delta G_{x2}^R$ ) before recombination of selected candidates. (B) Expected responses to selection of the performance of the mixture of the two species ( $\Delta G^R$ ) and of species contributions ( $\Delta G_{x1}^R$  and  $\Delta G_{x2}^R$ ) after recombination of selected candidates. The response to selection of the performance of the mixture expected when the selection criterion is the observed performance of tested mixtures is also reported before recombination of selected candidates ( $\delta G_y^R$  on graphs (A)) and after recombination ( $\Delta G_y^R$  on graphs (B)). The variance of direct effect was set equal to 1 in the two species.  $\sigma_{a1}^2$  and  $\sigma_{a2}^2$  are the variances of associate effects in species 1 and 2, respectively.  $\sigma_{(va)12}^2$  and  $\sigma_{(va)21}^2$  are the variances of direct  $\times$  associate interactions in the variances of the contributions of species 1 and 2, respectively. The correlation between the two species components of the plot error was set to +0.5. See Figure 4 (main text) for the meaning of  $\rho_1$ ,  $\rho_2$  and  $\rho_{12}$ .
